# Supplementary material for: Assessment of the Cow’s Milk-related Symptom Score (CoMiSS) as a diagnostic tool for cow’s milk protein allergy: a prospective, multicentre study in China (MOSAIC study)
Source: HighWire-hosted journal article supplement (doi:10.1136/bmjopen-2021-056641), 2022-02-01
Supplement: bmjopen-2021-056641supp003_data_supplement.pdf [file bmjopen-2021-056641supp003_data_supplement.pdf]

**TABLE S2: Diagnostic properties of CoMiSS for various cut-off values****A. Baseline CoMiSS (n=250)**

| CoMiSS cut-off | Sensitivity | Specificity | PPV   | NPV   |
|----------------|-------------|-------------|-------|-------|
| ≥ 5            | 88.5%       | 33.3%       | 89.7% | 30.6% |
| ≥ 6            | 78.8%       | 51.5%       | 91.4% | 27.0% |
| ≥ 7            | 68.2%       | 57.6%       | 91.4% | 21.6% |
| ≥ 8            | 56.2%       | 60.6%       | 90.4% | 17.4% |
| ≥ 9            | 43.8%       | 69.7%       | 90.5% | 15.9% |
| ≥ 10           | 35.9%       | 69.7%       | 88.6% | 14.2% |
| ≥ 11           | 25.8%       | 81.8%       | 90.3% | 14.4% |
| ≥ 12           | 20.3%       | 87.9%       | 91.7% | 14.4% |

**B. Baseline CoMiSS plus ≥50% reduction from baseline to Visit 2 (n=247)**

| CoMiSS cut-off | Sensitivity | Specificity | PPV   | NPV   |
|----------------|-------------|-------------|-------|-------|
| ≥ 5            | 38.1%       | 62.5%       | 87.2% | 13.1% |
| ≥ 6            | 35.3%       | 68.8%       | 88.4% | 13.7% |
| ≥ 7            | 34.4%       | 71.9%       | 89.2% | 14.0% |
| ≥ 8            | 30.2%       | 71.9%       | 87.8% | 13.3% |
| ≥ 9            | 25.6%       | 78.1%       | 88.7% | 13.5% |
| ≥ 10           | 20.5%       | 78.1%       | 86.3% | 12.8% |
| ≥ 11           | 16.3%       | 84.4%       | 87.5% | 13.0% |
| ≥ 12           | 14.0%       | 87.5%       | 88.2% | 13.1% |
